# Supplementary material for: Meningioma epigenetic grouping reveals biologic drivers and therapeutic vulnerabilities
Source: medRxiv preprint, doi:10.1101/2020.11.23.20237495, version 1 (2020-11-27)
Supplement: Extended Data Table 3 [file 237495_file05.xlsx]

## Sheet: Sheet1
Extended Data Table 3. Meningioma NF2 somatic short variants from targeted DNA sequencing across epigenetic groups.
Meningioma	Group	Mutation	SnpEff_annotation	NF2_SNV	NF2_CNV
M100	Merlin-intact	0		0	0
M12	Merlin-intact	0		0	0
M13	Merlin-intact	0		0	0
M19	Merlin-intact	0		0	1
M23	Merlin-intact	0		0	0
M44	Merlin-intact	0		0	1
M49	Merlin-intact	0		0	0
M5	Merlin-intact	c.676-1G>A	HIGH	1	1
M51	Merlin-intact	0		0	0
M54	Merlin-intact	0		0	0
M57	Merlin-intact	0		0	0
M61	Merlin-intact	0		0	0
M65	Merlin-intact	0		0	0
M67	Merlin-intact	0		0	0
M70	Merlin-intact	0		0	1
M79	Merlin-intact	0		0	0
M80	Merlin-intact	0		0	0
M87	Merlin-intact	0		0	1
M96	Merlin-intact	p.Met363fs	HIGH	1	1
M1	Immune-enriched	0		0	1
M17	Immune-enriched	0		0	1
M20	Immune-enriched	0		0	0
M21	Immune-enriched	p.Glu445fs	HIGH	1	1
M43	Immune-enriched	p.Pro482fs	HIGH	1	1
M52	Immune-enriched	p.Ser12fs	HIGH	1	1
M53	Immune-enriched	0		0	0
M56	Immune-enriched	0		0	1
M63	Immune-enriched	p.Glu167*	HIGH	1	0
M68	Immune-enriched	0		0	1
M75	Immune-enriched	p.Pro482fs	HIGH	1	1
M76	Immune-enriched	0		0	1
M77	Immune-enriched	c.698_709delTGCTTGGAGTGG	HIGH	1	1
M83	Immune-enriched	0		0	1
M86	Immune-enriched	p.Pro490fs	HIGH	1	0
M90	Immune-enriched	c.447+2T>C	HIGH	1	1
M92	Immune-enriched	p.Lys80*	HIGH	1	1
M93	Immune-enriched	p.Trp41*	HIGH	1	1
M10	Hypermitotic	p.Leu356fs	HIGH	1	1
M14	Hypermitotic	0		0	0
M18	Hypermitotic	0		0	1
M2	Hypermitotic	c.516+1G>T	HIGH	1	1
M3	Hypermitotic	p.Leu117fs	HIGH	1	1
M46	Hypermitotic	0		0	1
M47	Hypermitotic	p.Asn36fs	HIGH	1	0
M48	Hypermitotic	c.600-1G>C	HIGH	1	1
M55	Hypermitotic	0		0	1
M58	Hypermitotic	p.Glu421*	HIGH	1	1
M59	Hypermitotic	c.675+1G>T	HIGH	1	1
M60	Hypermitotic	p.Lys159fs	HIGH	1	1
M62	Hypermitotic	p.Glu442fs	HIGH	1	1
M64	Hypermitotic	p.Trp258*	HIGH	1	1
M69	Hypermitotic	0		0	1
M7	Hypermitotic	c.363G>A	HIGH	1	1
M71	Hypermitotic	0		0	1
M72	Hypermitotic	c.448-1G>A	HIGH	1	1
M73	Hypermitotic	p.Gln125*	HIGH	1	1
M74	Hypermitotic	p.Gln453fs	HIGH	1	1
M8	Hypermitotic	p.Asp281fs	HIGH	1	1
M89	Hypermitotic	p.Tyr153*	HIGH	1	1
M9	Hypermitotic	p.Leu208Pro	MODERATE	1	1
M91	Hypermitotic	0		0	1
M95	Hypermitotic	p.Ser87*	HIGH	1	1
M97	Hypermitotic	c.600-1G>C	HIGH	1	1
M98	Hypermitotic	0		0	1
